# Supplementary material for: Community Specialist Teams for Older Persons (CST-OP) at risk of, or living with frailty in Ireland: a prospective cohort study of a new model of integrated care for community dwelling older adults
Source: Research Square preprint supplement (doi:10.21203/rs.3.rs-5890108/v1), 2025-04-09
Supplement: Supplementary file 2 [file 34d0827310ddc9247475bc64.docx]

**Title:** Community Specialist Teams for Older Persons (CST-OP) at risk of, or living with frailty in Ireland: a prospective cohort study of a new model of integrated care for community dwelling older adults.

**Additional File 4: The number of interventions provided by the community specialist teams for older people allied health professionals**

| **Service provision at 30 days** | |
| --- | --- |
| Encounter with CST PT/PT assistant, n (%) | 185 (61.1) |
| Encounter with CST SLT, n (%) | 59 (19.5) |
| Encounter with CST dietician, n (%) | 15 (5) |
| Encounter with CST OT, n (%) | 41 (13.5) |
| Encounter with CST physio/physio assistant/OT, n (%) | 195 (64.4) |
| **Service provision at 180 days** | |
| Encounter with ICPOP physio/physio assistant, n (%) | 196 (64.7) |
| Encounter with ICPOP SLT, n (%) | 47 (15.5) |
| Encounter with ICPOP dietician, n (%) | 24 (7.9) |
| Encounter with ICPOP OT, n (%) | 48 (15.8) |
| Encounter with PT/PT assistant /OT, n (%) | 203 (67) |

**Abbreviations**: CST, community specialist team; PT, physiotherapist; SLT, speech and language therapist; OT, occupational therapist.
