# Supplementary material for: Community Specialist Teams for Older Persons (CST-OP) at risk of, or living with frailty in Ireland: a prospective cohort study of a new model of integrated care for community dwelling older adults
Source: Research Square preprint supplement (doi:10.21203/rs.3.rs-5890108/v1), 2025-04-09
Supplement: Supplementary file 3 [file 9c0c5a84ab1f42b87001bfde.docx]

**Title:** Community Specialist Teams for Older Persons (CST-OP) at risk of, or living with frailty in Ireland: a prospective cohort study of a new model of integrated care for community dwelling older adults.

**Additional File 2: Core components of Comprehensive Geriatric Assessment**

| **Elements of CGA** | **Yes/No** |
| --- | --- |
| Clinical leadership | Yes |
| Structured assessment | Yes |
| Multidisciplinary team meetings | Yes |
| Goal setting | Yes |
| Involving patients and carers in goal setting | Yes |
| Outpatient follow-up | Yes |
| Ward environment | No |
| Adequate time | Yes |
| Speciality knowledge, experience, competence | Yes |
| Tailoring treatment plans to the individual | Yes |
