# Supplementary material for: Community Specialist Teams for Older Persons (CST-OP) at risk of, or living with frailty in Ireland: a prospective cohort study of a new model of integrated care for community dwelling older adults
Source: Research Square preprint supplement (doi:10.21203/rs.3.rs-5890108/v1), 2025-04-09
Supplement: Supplementary file 4 [file 9fb033fb624e56eebdb241fa.docx]

**Title:** Community Specialist Teams for Older Persons (CST-OP) at risk of, or living with frailty in Ireland: a prospective cohort study of a new model of integrated care for community dwelling older adults.

**Additional File 3:** A detailed analysis of the Patient Assessment of Integrated Elderly Care (PAIEC) Questionnaire at 30-days

|  | N | Minimum | Maximum | Mean | Std. Deviation |
| --- | --- | --- | --- | --- | --- |
| Expectations | 290 | 1 | 5 | 4.58 | 0.924 |
| Choice | 292 | 1 | 5 | 4.60 | 0.838 |
| Medicines | 288 | 1 | 5 | 4.68 | 0.849 |
| Care Problems | 289 | 1 | 6 | 4.53 | 0.821 |
| Information | 286 | 1 | 6 | 4.24 | 1.246 |
| Lifestyle | 293 | 1 | 5 | 4.55 | 0.694 |
| Values | 290 | 1 | 5 | 4.44 | 0.792 |
| Behaviour | 287 | 1 | 6 | 4.38 | 0.861 |
| Goals | 288 | 1 | 6 | 3.95 | 1.213 |
| Ageing | 283 | 1 | 6 | 4.00 | 1.114 |
| Care Plan | 182 | 1 | 5 | 2.06 | 1.679 |
| Daily Plan | 275 | 1 | 5 | 4.06 | 1.190 |
| Plan Ahead | 278 | 1 | 5 | 4.04 | 1.147 |
| Affects | 280 | 1 | 5 | 3.92 | 1.177 |
| Participtate | 213 | 1 | 5 | 3.54 | 1.689 |
| Contact FU | 146 | 1 | 5 | 3.64 | 1.709 |
| Community | 173 | 1 | 5 | 3.70 | 1.640 |
| Referrals | 284 | 1 | 5 | 4.73 | 0.619 |
| Engagement | 288 | 1 | 5 | 4.70 | 0.668 |
| Follow-up | 249 | 1 | 5 | 4.46 | 0.992 |

|  | **Average Rating** | **Average score** | **Standard Deviation** |
| --- | --- | --- | --- |
| Patient Activation and Contextual Information (/35) | 4.52 | 31.61 | 0.880 |
| Goal Setting and Problem Solving (/35) | 3.77 | 26.41 | 1.197 |
| Coordination and Follow-Up Domain (/30) | 4.13 | 24.77 | 1.219 |
| Total Scale | 4.14 | 82.80 | 1.099 |
