# Supplementary material for: Community Specialist Teams for Older Persons (CST-OP) at risk of, or living with frailty in Ireland: a prospective cohort study of a new model of integrated care for community dwelling older adults
Source: Research Square preprint supplement (doi:10.21203/rs.3.rs-5890108/v1), 2025-04-09
Supplement: Supplementary file 5 [file f31b74d5416a2a164d853ecc.docx]

**Title:** Community Specialist Teams for Older Persons (CST-OP) at risk of, or living with frailty in Ireland: a prospective cohort study of a new model of integrated care for community dwelling older adults.

**Additional File 5: Detailed description of primary, community and continuing care service use**

| **Service provision at 30 days** | |
| --- | --- |
| GP attendance, n (%) | **94 (31)** |
| PHN attendance, n (%) | 65 (21.5) |
| HH attendance, n (%) | 90 (29.7) |
| Physiotherapy attendance, n (%) | 25 (8.3) |
| Occupational Therapy attendance, n (%) | 24 (7.9) |
| Speech and Language therapy attendance, n (%) | 2 (0.7) |
| Daycare attendance, n (%) | 6 (2.0) |
| Dietician attendance, n (%) | 2 (0.7) |
| Agency attendance (ALONE), n (%) | 4 (1.4) |
| **Service provision at 180 days** | |
| GP attendance, n (%) | 210 (69.3) |
| PHN attendance, n (%) | 97 (32.0) |
| HH attendance, n (%) | 140 (46.2) |
| Physiotherapy attendance, n (%) | 34 (11.2) |
| Occupational Therapy attendance, n (%) | 53 (17.5) |
| Speech and Language therapy attendance, n (%) | 3 (1) |
| Daycare attendance, n (%) | 12 (4) |
| Dietician attendance, n (%) | 4 (1.3) |
| Meals on Wheels, n (%) | 4 (1.3) |

**Abbreviations**: GP, General Practitioner; PHN, public health nurse; HH, home help.
